# Supplementary material for: Interdisciplinary strategy to survey phytoplankton dynamics of a eutrophic lake under rain forcing: description of the instrumental set-up and first results
Source: Copernicus journal article supplement (doi:10.5194/bg-2022-100), 2022-05-24

Comparison of two methods: the flow cytometry and microscopy-based methods for lake and rain samples

A) Concentration of photosynthetic cells during rain events (Cell.L<sup>-1</sup>)

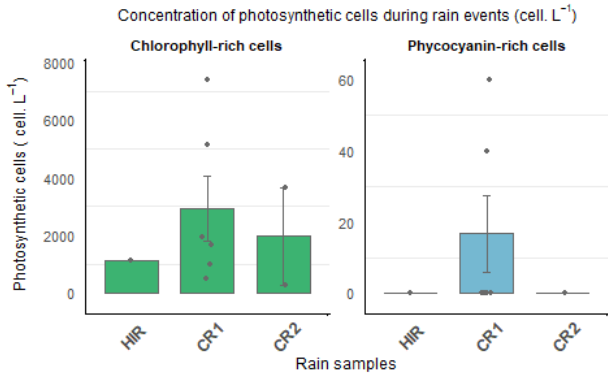

B) Concentration of photosynthetic cells during the lake campaign at the three depths (Cell.L<sup>-1</sup>)

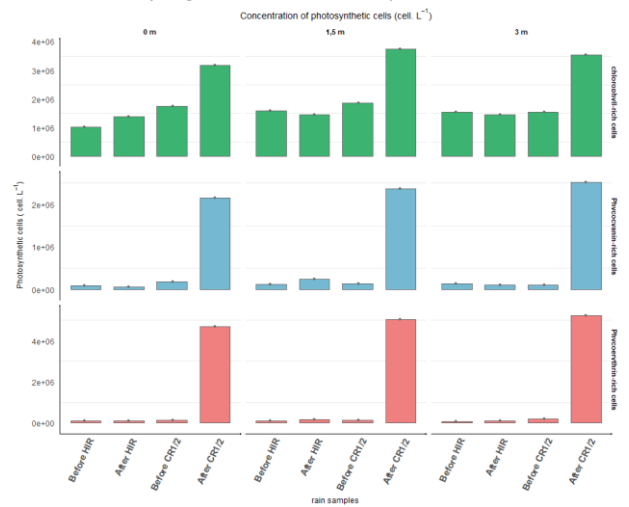

C) NOT AVAILABLE

D) Microscopy on lake samples (grouped by pigments species type)

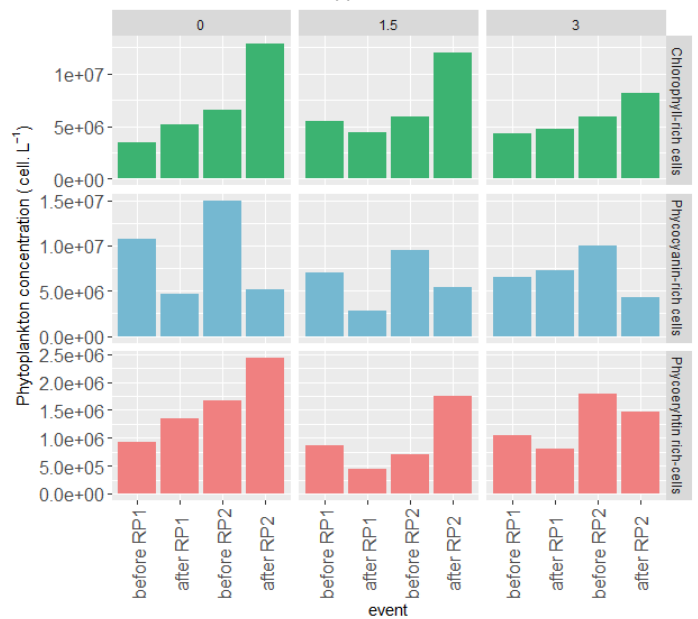

Supplement: Supplementary file [file bg-2022-100-AC1-supplement.pdf]
