# Supplementary material for: Interdisciplinary strategy to survey phytoplankton dynamics of a eutrophic lake under rain forcing: description of the instrumental set-up and first results
Source: Copernicus journal article supplement (doi:10.5194/bg-2022-100), 2022-05-24
Supplement: Supplementary file [file bg-2022-100-AC2-supplement.pdf]

A

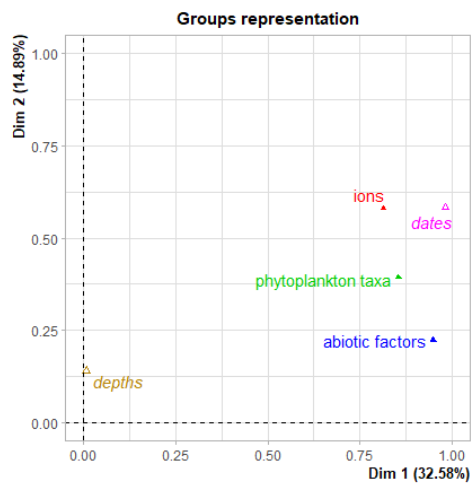

B

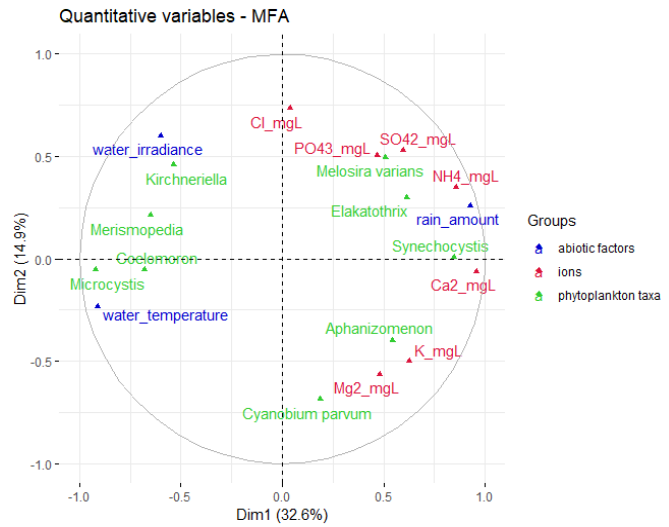

C

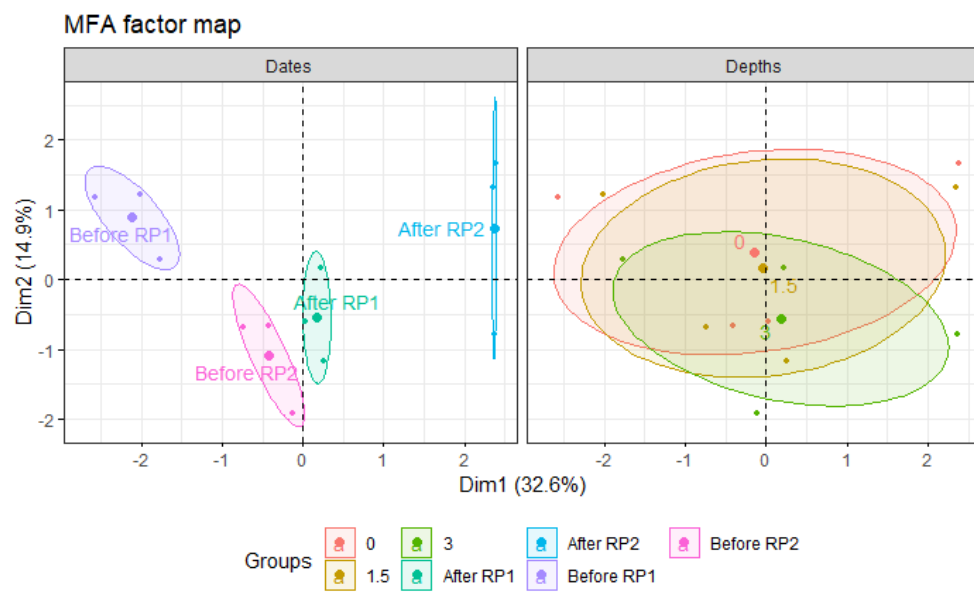

**Fig. 9: Multiple factor analysis (MFA). Projection of variable groups (A), Correlation circle map of the MFA, for clarity, only variables with a  $\cos^2$  equal to and higher than 0.45 are represented in the correlation circle. (B), individual factor map, showing the position of samples in the MFA with confidence ellipses around "depths" and "dates" variables (C).**

A

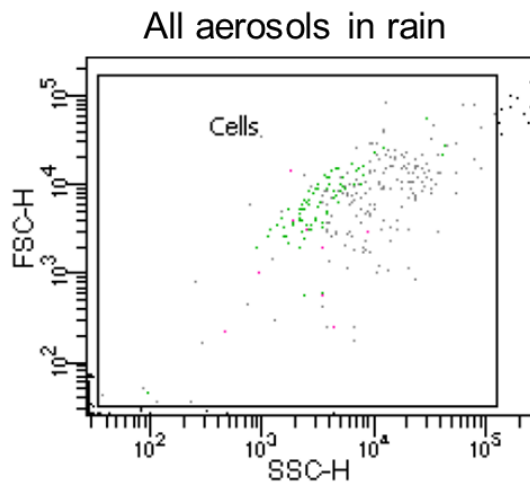

B

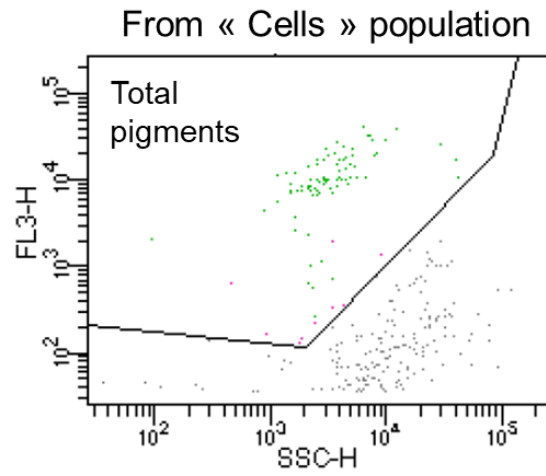

C

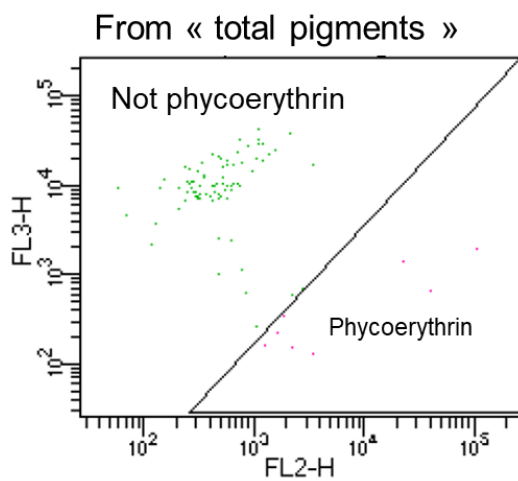

D

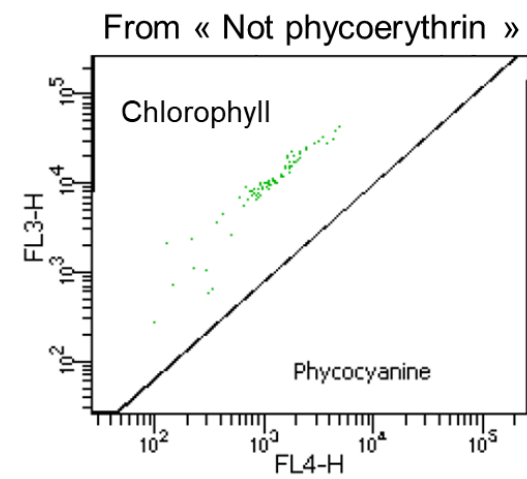

**Suppl. figure: Flow cytometry based-method to quantify the autofluorescence from specific pigment from photosynthetic cells in the rain samples. Detection of all aerosols in the rain (A), the total pigments population based on minimal chlorophyll fluorescence (B), Phycoerythrin population (C), Chlorophyll, and Phycocyanin populations (C).**
